# Supplementary material for: Grouping nanoparticles based on properties and transcriptomic response: are we dealing with a single nanoform or a set of nanoforms with common pulmonary hazards?
Source: Royal Society of Chemistry journal article supplement (doi:10.1039/d5en01090j), 2026-01-01
Supplement: d5en01090j1.xlsx [file d5en01090j1.xlsx]

## Sheet: Tabele 1S
Table 1S: The reactive oxygen species (ROS) for several concentrations of TiO2 NPs have been determined in the laboratory of The National Research Centre for the Working Environment using fluorescence probes
ID	ROS_conc_1.56	ROS_conc_3.13	ROS_conc_6.26	ROS_conc_12.52	ROS_conc_25.03	ROS_conc_50.06	ROS_conc_100.125	ROS_conc_200.25	Slope of the ROS dose-response curve
NRCWE-001	-469.021	-534.771	-312.854	-404.021	-14.7708	221.646	625.479	1399.06	9.4907
NRCWE-002	-127.687	-208.854	-45.6875	191.146	834.396	1833.31	3614.73	6762.65	35.418
NRCWE-030	-543.927	-629.01	-482.01	-592.844	-323.927	-255.927	189.656	688.073	6.5482
aTiO28 (NM-101)	-589.069	-782.403	-605.958	-807.344	-586.844	-489.594	89.3229	869.99	8.0841
aTiO220 (NM-102)	-418.042	-461.292	-380.875	-368.625	-210.708	93.625	623.375	1565.46	10.25
raTiO220 (NM-105)	-503.062	-587.646	-340.646	-198.646	278.938	663.771	1760.52	2799.85	23.139
rTiO220 (HY) (NM-103)	-548.948	-634.948	-426.365	-402.615	229.969	687.469	2010.39	4052.14	23.67
rTiO220 (HP) (NM-104)	-463.313	-579.229	-468.063	-539.979	-59.8958	265.771	1021.27	2793.94	16.772
	Experimental Protocol
	Concentration in wells	Dilution series
	200,25 µg/ml	267 µg/ml	stam (267 µg/ml)
	100,125 µg/ml	133,34 µg/ml	1 ml 267 µg/ml +	1 ml HBSS
	50,06 µg/ml	66,67 µg/ml	1 ml 133,34 µg/ml +	1 ml HBSS
	25,03 µg/ml	33,33 µg/ml	1 ml 66,67 µg/ml +	1 ml HBSS
	12,52 µg/ml	16,67 µg/ml	1 ml 33,33 µg/ml +	1 ml HBSS
	6,26 µg/ml	8,33 µg/ml	1 ml 16,67 µg/ml +	1 ml HBSS
	3,13 µg/ml	4,17 µg/ml	1 ml 8,33 µg/ml +	1 ml HBSS
	1,56 µg/ml	2,08 µg/ml	1 ml 4,17 µg/ml +	1 ml HBSS
-	The stam concentration of particles in HBSS, 267 µg/ml, is sonicated for 16 minutes.
-	150 µL of the STAM solution and the dilution serie are plated in triplicate in a 96-well plate.
-	For control: 150 µL HBSS is added in 24 wells.
-	50 µL 0,04 mM DCFH-DA/NaOH/HBSS (PROBE) is added to each well.
-	The plate was covered in aluminium foil and incubated at 37ᵒC for 3 hours.
-	The plate was then read on spectrofluormer-VICTOR-WALLAC 2.
-	The results show number of fluorescein (arbitrary units).

## Sheet: Table 2S
Table 2S: Physicochemical characteristics of TiO2 NPs
ID	Size (nm)​	BET_mean ​ (SSA) (m2/g)	Zeta potential (water pH~7) [mV]	Anatase %	Rutile %	Slope of the ROS dose-response curve	Surface modification	Surface charge
NRCWE-001	10	99	-26	0	1	9.4907	unmodified	negative
NRCWE-002	10	84	25	0	1	35.418	coated	positive
NRCWE-030	10.5	139.1	-30	0	1	6.5482	unmodified	negative
aTiO28 (NM-101)	8	231.7	-27.5	1	0	8.0841	coated	negative
aTiO220 (NM-102)	20	90	30.3	1	0	10.25	unmodified	positive
raTiO220 (NM-105)	22	54.15	-32.6	0.85	0.15	23.139	unmodified	negative
rTiO220 (HY) (NM-103)	20	51.275	39.1	0	1	23.67	coated	positive
rTiO220 (HP) (NM-104)	21	57.125	4.39	0	1	16.772	coated	positive
References:
1	H.Wallin et al. 2016, Mutagenesis, Doi: 10.1093/mutage/gew046
2	S.Halappanavar at el. 2015, Environ Mol Mutagen, DOI: 10.1002/em.21936
3	P.H. Danielsen et al. 2020, Toxicology and Applied Pharmacology, Doi: 10.1016/j.taap.2019.114830
4	S. Halappanavar et al. 2019, NanoImpact, https://doi.org/10.1016/j.impact.2019.100158
5	L.Rahman et al.. 2017, Mutagenesis, Doi:10.1093/mutage/gew048
6	Deliverable D1.6: Report on Grouping Demonstration (NanoReg2 Grant Number 646221)

## Sheet: Table 3S
Table 3S: Benchmark dose (BMD) values for the most sensitive transcriptomic pathway induced by TiO2 nanoforms, derived from mouse lung transcriptomics following single intratracheal instillation at doses of 18–162 µg/mouse (up to 486 µg/mouse for selected nanoforms), with gene expression assessed 24 h post-exposure.
ID	Acute Phase Response Signaling	Granulocyte Adhesion and Diapedesis	Hepatic Fibrosis / Hepatic Stellate Cell Activation	IL-10 Signaling	Atherosclerosis Signaling	Agranulocyte Adhesion and Diapedesis	TREM1 Signaling	IL-6 Signaling	IL-8 Signaling	Role of Macrophages, Fibroblasts and Endothelial Cells in Rheumatoid Arthritis	LXR/RXR Activation	Role of IL-17F in Allergic Inflammatory Airway Diseases	IL-17 Signaling	Hepatic Cholestasis	Communication between Innate and Adaptive Immune Cells	Role of Osteoblasts, Osteoclasts and Chondrocytes in Rheumatoid Arthritis	Glucocorticoid Receptor Signaling
NRCWE-001	32.4209	28.212	19.8575	33.1262	30.9662	28.212	34.461	19.8575	28.212	30.9662	486	486	486	19.8575	486	486	486
NRCWE-002	22.5424	486	21.5683	486	486	486	486	486	486	486	29.3865	486	486	486	486	486	486
NRCWE-030	11.133	17.8633	20.4527	16.618	16.8462	19.1086	20.8897	16.618	486	16.618	18.2959	20.4527	20.4527	16.618	19.1086	14.9289	18.2959
aTiO28	53.4591	62.059	50.3796	54.4007	45.7406	83.0225	55.4362	49.0624	46.0377	57.9056	51.2607	103.986	79.037	486	486	43.5598	51.4233
aTiO220	486	486	486	486	486	486	486	486	486	486	486	486	486	486	486	486	44.456
raTiO220	22.6475	26.679	8.92385	20.318	52.5645	27.8924	486	486	24.4208	34.8541	486	486	486	486	486	41.4412	18.2853
rTiO220 (HY)	486	486	62.7464	486	486	486	486	486	486	486	71.762	486	486	486	486	486	486
rTiO220 (HP)	116.581	40.7451	165.42	77.0744	99.0768	129.092	486	77.0744	486	122.837	158.288	486	486	137.435	151.189	133.885	86.0378
References:
1	S. Halappanavar, L. Rahman, J. Nikota, S.S. Poulsen, Y. Ding, P. Jackson, H. Wallin, O. Schmid, U. Vogel, A. Williams Ranking of nanomaterial potency to induce pathway perturbations associated with lung responses, NanoImpact, 2019, 17, 100158, https://doi.org/10.1016/j.impact.2019.100158
